# Supplementary material for: Effectiveness of a fluid chart in outpatient management of suspected dengue fever: A pilot study
Source: PubMed Central journal article supplement (PMC5627892; doi:10.1371/journal.pone.0183544), 2017-10-04
Supplement: pone.0183544.s001.pdf [file pone.0183544.s001.pdf]

**S1 Appendix: Intervention tool: Fluid chart**

Name / Nama:

Day and date / Hari serta tarikh:

How many days since the fever started / sudah berapa hari demam:

| Time/masa                 | Number of cups that you drank /bilangan cawan yang diminum | Types of drink /jenis minuman | Number of fluid bottles received (drip): at clinic or A+E/bilangan botol drip yang diterima |
|---------------------------|------------------------------------------------------------|-------------------------------|---------------------------------------------------------------------------------------------|
| <b>Morning / Pagi</b>     |                                                            |                               |                                                                                             |
| 8.00am                    |                                                            |                               |                                                                                             |
| 9.00am                    |                                                            |                               |                                                                                             |
| 10.00am                   |                                                            |                               |                                                                                             |
| 11.00am                   |                                                            |                               |                                                                                             |
| 12.00pm                   |                                                            |                               |                                                                                             |
| <b>Afternoon / Petang</b> |                                                            |                               |                                                                                             |
| 1.00pm                    |                                                            |                               |                                                                                             |
| 2.00pm                    |                                                            |                               |                                                                                             |
| 3.00pm                    |                                                            |                               |                                                                                             |
| 4.00pm                    |                                                            |                               |                                                                                             |
| 5.00pm                    |                                                            |                               |                                                                                             |
| 6.00pm                    |                                                            |                               |                                                                                             |
| <b>Night / Malam</b>      |                                                            |                               |                                                                                             |
| 7.00pm                    |                                                            |                               |                                                                                             |
| 8.00pm                    |                                                            |                               |                                                                                             |
| 9.00pm                    |                                                            |                               |                                                                                             |
| 10.00pm                   |                                                            |                               |                                                                                             |
| 11.00pm                   |                                                            |                               |                                                                                             |
| 12.00am                   |                                                            |                               |                                                                                             |
| 1.00am                    |                                                            |                               |                                                                                             |
| 2.00am                    |                                                            |                               |                                                                                             |
| 3.00am                    |                                                            |                               |                                                                                             |
| 4.00am                    |                                                            |                               |                                                                                             |
| 5.00am                    |                                                            |                               |                                                                                             |
| <b>Morning / Pagi</b>     |                                                            |                               |                                                                                             |
| 6.00am                    |                                                            |                               |                                                                                             |
| 7.00am                    |                                                            |                               |                                                                                             |
| 8.00am                    |                                                            |                               |                                                                                             |
