# Supplementary material for: Effectiveness of a fluid chart in outpatient management of suspected dengue fever: A pilot study
Source: PLoS One. 2017 Oct 4;12(10):e0183544. doi: 10.1371/journal.pone.0183544 (PMC5627892; doi:10.1371/journal.pone.0183544)
Supplement: S4 File — (XLSX) [file pone.0183544.s004.xlsx]

## Sheet: Sheet1
F1	F2	C1 (F1+F2)	F3	C2 (C1 +F3)	F4	C3 (C2 +F4)	F5	C4 (C3 +F5)	F6	C5 (C4+F6)	F7	C6 (C5+F7)	Fluid Intake	AVR
875	2275	3150		3150		3150		3150		3150		3150	2	1575
6650	6125	12775	6650	19425	6300	25725	7000	32725	8225	40950		40950	6	6825
3937.5	2800	6737.5	2625	9362.5	2625	11987.5	2712.5	14700	2275	16975		16975	6	2829.17
4550	5250	9800	6300	16100		16100		16100		16100		16100	3	5366.67
1575	1400	2975	1225	4200		4200		4200		4200		4200	3	1400
1750	1400	3150		3150		3150		3150		3150		3150	2	1575
1225	1575	2800	1400	4200	1400	5600	1400	7000		7000		7000	5	1400
262.5	875	1137.5		1137.5		1137.5		1137.5		1137.5		1137.5	2	568.75
1400	1400	2800	1925	4725	1925	6650	1925	8575	2625	11200		11200	6	1866.67
2275	1750	4025	2450	6475	2450	8925		8925		8925		8925	4	2231.25
1750		1750		1750		1750		1750		1750		1750	1	1750
2100	2012.5	4112.5	3325	7437.5	3325	10762.5	875	11637.5	1925	13562.5	1837.5	15400	7	2200
7325	11725	19050		19050		19050		19050		19050		19050	2	9525
1925	1050	2975	1400	4375	1750	6125		6125		6125		6125	4	1531.25
6475		6475		6475		6475		6475		6475		6475	1	6475
1925		1925		1925		1925		1925		1925		1925	1	1925
2800	2625	5425	2975	8400	4025	12425		12425		12425		12425	4	3106.25
2800	4025	6825	2450	9275	4900	14175		14175		14175		14175	4	3543.75
12600	7350	19950		19950		19950		19950		19950		19950	2	9975
1400	700	2100	1400	3500	875	4375		4375		4375		4375	4	1093.75
2625	2275	4900		4900		4900		4900		4900		4900	2	2450
5950	8050	14000	6300	20300		20300		20300		20300		20300	3	6766.67
3150	2800	5950	2625	8575	3325	11900	3150	15050	3325	18375	3150	21525	7	3075
700	1550	2250		2250		2250		2250		2250		2250	2	1125
2800		2800		2800		2800		2800		2800		2800	1	2800
6000	3000	9000		9000		9000		9000		9000		9000	2	4500
1575	2100	3675	2300	5975	2550	8525	2350	10875	2700	13575		13575	6	2262.5
1225	1400	2625	962.5	3587.5		3587.5		3587.5		3587.5		3587.5	3	1195.83
3150		3150		3150		3150		3150		3150		3150	1	3150
2450	2625	5075	1750	6825	1750	8575	1750	10325		10325		10325	5	2065
3300		3300		3300		3300		3300		3300		3300	1	3300
350		350		350		350		350		350		350	1	350
2450		2450		2450		2450		2450		2450		2450	1	2450
5250		5250		5250		5250		5250		5250		5250	1	5250
2275		2275		2275		2275		2275		2275		2275	1	2275
2075		2075	1700	3775	1050	4825		4825		4825		4825	3	1608.33
6275	4700	10975	5337.5	16312.5	4025	20337.5		20337.5		20337.5		20337.5	4	5084.38
3150		3150		3150		3150		3150		3150		3150	1	3150
875	1050	1925	1050	2975		2975		2975		2975		2975	3	991.667
3150	3587.5	6737.5		6737.5		6737.5		6737.5		6737.5		6737.5	2	3368.75
4900	5250	10150	5775	15925	5950	21875	7175	29050	6300	35350		35350	6	5891.67
1575	1575	3150	1225	4375	2275	6650	1925	8575	1575	10150	1400	11550	7	1650
1925	1050	2975	1400	4375	1050	5425	1050	6475		6475		6475	5	1295
1312.5	2725	4037.5	3525	7562.5		7562.5		7562.5		7562.5		7562.5	3	2520.83
1400	2225	3625		3625	2450	6075	1925	8000		8000		8000	4	2000
2450		2450		2450		2450		2450		2450		2450	1	2450
2275	3325	5600	2625	8225		8225		8225		8225		8225	3	2741.67
2250	1575	3825	1875	5700	1575	7275	1925	9200		9200		9200	5	1840
3325	2975	6300		6300		6300		6300		6300		6300	2	3150
2150	2050	4200	2100	6300		6300		6300		6300		6300	3	2100
1725	1175	2900	1200	4100		4100		4100		4100		4100	3	1366.67
1575	1750	3325	2275	5600	2100	7700	2100	9800		9800		9800	5	1960
1225	1225	2450	1575	4025		4025		4025		4025		4025	3	1341.67
1400	2187.5	3587.5		3587.5		3587.5		3587.5		3587.5		3587.5	2	1793.75
1662.5	1225	2887.5	1137.5	4025		4025		4025		4025		4025	3	1341.67
1725	2625	4350	1575	5925		5925		5925		5925		5925	3	1975
4025	5600	9625	6825	16450	7000	23450		23450		23450		23450	4	5862.5
5075	3275	8350	2225	10575		10575		10575		10575		10575	3	3525
4900		4900		4900		4900		4900		4900		4900	1	4900
4375	6975	11350	7000	18350	8400	26750		26750		26750		26750	4	6687.5
4025	5950	9975	3325	13300	4200	17500		17500		17500		17500	4	4375
5425	5775	11200		11200		11200		11200		11200		11200	2	5600
2450	1750	4200		4200		4200		4200		4200		4200	2	2100
1550		1550		1550		1550		1550		1550		1550	1	1550
2800	2275	5075	2300	7375	2450	9825	1775	11600		11600		11600	5	2320
6700	4000	10700		10700		10700		10700		10700		10700	2	5350
1725	1987.5	3712.5		3712.5		3712.5		3712.5		3712.5		3712.5	2	1856.25
875		875		875		875		875		875		875	1	875
1500		1500		1500		1500		1500		1500		1500	1	1500
1500	2000	3500	2500	6000	925	6925		6925		6925		6925	4	1731.25
2500	1000	3500		3500		3500		3500		3500		3500	2	1750
2125	1100	3225		3225		3225		3225		3225		3225	2	1612.5
2500		2500		2500		2500		2500		2500		2500	1	2500
2000	2500	4500		4500		4500		4500		4500		4500	2	2250
1750	4125	5875	2250	8125	1500	9625	2250	11875		11875		11875	5	2375
6000	4000	10000	4000	14000		14000		14000		14000		14000	3	4666.67
5000	2000	7000	4500	11500		11500		11500		11500		11500	3	3833.33
1500	6000	7500	1000	8500		8500		8500		8500		8500	3	2833.33
1500	1500	3000	1500	4500	1500	6000	1500	7500		7500		7500	5	1500
1000	2000	3000		3000		3000		3000		3000		3000	2	1500
1500	2500	4000	2800	6800		6800		6800		6800		6800	3	2266.67
3000		3000		3000		3000		3000		3000		3000	1	3000
1500		1500		1500		1500		1500		1500		1500	1	1500
4500	3000	7500	4500	12000	5475	17475		17475		17475		17475	4	4368.75
3000		3000		3000		3000		3000		3000		3000	1	3000
3000		3000		3000		3000		3000		3000		3000	1	3000
1275		1275		1275		1275		1275		1275		1275	1	1275
3400	2500	5900	2500	8400		8400		8400		8400		8400	3	2800
4675	2500	7175	3500	10675		10675		10675		10675		10675	3	3558.33
2375	4000	6375	4000	10375		10375		10375		10375		10375	3	3458.33
3000	3000	6000	3000	9000	2500	11500		11500		11500		11500	4	2875
2725	2700	5425		5425		5425		5425		5425		5425	2	2712.5
1400		1400		1400		1400		1400		1400		1400	1	1400
1000	3000	4000		4000		4000		4000		4000		4000	2	2000
3000		3000		3000		3000		3000		3000		3000	1	3000
1500	1500	3000		3000		3000		3000		3000		3000	2	1500
750		750		750		750		750		750		750	1	750
2850	3850	6700	2000	8700		8700		8700		8700		8700	3	2900
2000		2000		2000		2000		2000		2000		2000	1	2000
1200		1200		1200		1200		1200		1200		1200	1	1200
6700	2900	9600	2550	12150		12150		12150		12150		12150	3	4050
3000	4500	7500	4750	12250		12250		12250		12250		12250	3	4083.33
350		350		350		350		350		350		350	1	350
1500	2500	4000		4000		4000		4000		4000		4000	2	2000
1500	3000	4500	2000	6500		6500		6500		6500		6500	3	2166.67
1225	5000	6225	3000	9225	2250	11475	3000	14475		14475		14475	5	2895
2250	2000	4250	2000	6250	2000	8250	2000	10250	2000	12250	2325	14575	7	2082.14
3000	3000	6000	3500	9500		9500		9500		9500		9500	3	3166.67
1250	1750	3000	1750	4750	1250	6000		6000		6000		6000	4	1500
3000	4500	7500	5000	12500		12500		12500		12500		12500	3	4166.67
3500		3500		3500		3500		3500		3500		3500	1	3500
500	500	1000	750	1750	2665	4415	2000	6415	2500	8915		8915	6	1485.83
4500	4000	8500	4000	12500		12500		12500		12500		12500	3	4166.67
4500	6000	10500		10500		10500		10500		10500		10500	2	5250
2762.5	3500	6262.5	3200	9462.5	3000	12462.5	3500	15962.5		15962.5		15962.5	5	3192.5
2200	1725	3925	2100	6025	2625	8650	2950	11600		11600		11600	5	2320
1400	1225	2625	1400	4025	1400	5425		5425		5425		5425	4	1356.25
1750	1750	3500		3500		3500		3500		3500		3500	2	1750
3000		3000		3000		3000		3000		3000		3000	1	3000
3875		3875		3875		3875		3875		3875		3875	1	3875
1625		1625		1625		1625		1625		1625		1625	1	1625
3000	3000	6000		6000		6000		6000		6000		6000	2	3000
1025	1200	2225	1875	4100		4100		4100		4100		4100	3	1366.67
3000	3000	6000		6000		6000		6000		6000		6000	2	3000
800	800	1600		1600		1600		1600		1600		1600	2	800
